# Supplementary material for: Cardiac rehabilitation to improve health-related quality of life following trans-catheter aortic valve implantation: a randomised controlled feasibility study: RECOVER–TAVI Pilot, ORCA 4, For the Optimal Restoration of Cardiac Activity Group
Source: PubMed Central journal article supplement (PMC6293531; doi:10.1186/s40814-018-0363-8), 2018-12-13
Supplement: 40814_2018_363_MOESM3_ESM.pdf [file 40814_2018_363_MOESM3_ESM.pdf]

| RECOVER-TAVR ID                                                                    |
|------------------------------------------------------------------------------------|
| RT - 001                                                                           |
| RT - 002                                                                           |
| RT - 003                                                                           |
| RT - 004                                                                           |
| RT - 005                                                                           |
| RT - 006                                                                           |
| RT - 008                                                                           |
| RT - 009                                                                           |
| RT - 010                                                                           |
| RT - 011                                                                           |
| RT - 012                                                                           |
| RT - 013                                                                           |
| RT - 014                                                                           |
| RT - 015                                                                           |
| RT - 016                                                                           |
| RT - 017                                                                           |
| RT - 018                                                                           |
| RT - 019                                                                           |
| RT - 020                                                                           |
| RT - 021                                                                           |
| RT - 022                                                                           |
| RT - 023                                                                           |
| RT - 024                                                                           |
| RT - 025                                                                           |
| RT - 026                                                                           |
| RT - 027                                                                           |
| RT - 028                                                                           |
| RT - 029                                                                           |
| RT - 030                                                                           |
| RT - 032                                                                           |
|                                                                                    |
| Note - Patient - RT - 007 and 031 did not receive TAVI, no infoflex data available |

| Type of TAVI procedure | Sex       | Age | Diabetes                      | Smoking status  |
|------------------------|-----------|-----|-------------------------------|-----------------|
| TAVI                   | 2. Female | 78  | 0. Not diabetic               | 0. Never smoked |
| TAVI                   | 2. Female | 80  | 0. Not diabetic               | 0. Never smoked |
| TAVI                   | 1. Male   | 84  | 0. Not diabetic               | 1. Ex smoker    |
| TAVI                   | 1. Male   | 77  | 3. Diabetes (insulin)         | 0. Never smoked |
| TAVI                   | 1. Male   | 90  | 0. Not diabetic               | 1. Ex smoker    |
| TAVI                   | 2. Female | 85  | 0. Not diabetic               | 0. Never smoked |
| TAVI                   | 2. Female | 83  | 0. Not diabetic               | 0. Never smoked |
| TAVI                   | 1. Male   | 85  | 0. Not diabetic               | 0. Never smoked |
| TAVI                   | 1. Male   | 75  | 0. Not diabetic               | 1. Ex smoker    |
| TAVI                   | 2. Female | 91  | 0. Not diabetic               | 1. Ex smoker    |
| TAVI                   | 1. Male   | 80  | 0. Not diabetic               | 1. Ex smoker    |
| TAVI                   | 2. Female | 80  | 3. Diabetes (insulin)         | 1. Ex smoker    |
| TAVI                   | 1. Male   | 89  | 0. Not diabetic               | 1. Ex smoker    |
| TAVI                   | 1. Male   | 88  | 0. Not diabetic               | 0. Never smoked |
| TAVI                   | 2. Female | 82  | 1. Diabetes (dietary control) | 0. Never smoked |
| TAVI                   | 2. Female | 85  | 0. Not diabetic               | 0. Never smoked |
| TAVI                   | 2. Female | 72  | 0. Not diabetic               | 0. Never smoked |
| TAVI                   | 2. Female | 80  | 0. Not diabetic               | 1. Ex smoker    |
| TAVI                   | 2. Female | 82  | 0. Not diabetic               | 1. Ex smoker    |
| TAVI                   | 1. Male   | 78  | 0. Not diabetic               | 0. Never smoked |
| TAVI                   | 1. Male   | 86  | 0. Not diabetic               | 1. Ex smoker    |
| TAVI                   | 1. Male   | 87  | 0. Not diabetic               | 1. Ex smoker    |
| TAVI                   | 1. Male   | 75  | 2. Diabetes (oral medicine)   | 1. Ex smoker    |
| TAVI                   | 2. Female | 83  | 2. Diabetes (oral medicine)   | 1. Ex smoker    |
| TAVI                   | 1. Male   | 80  | 2. Diabetes (oral medicine)   | 0. Never smoked |
| TAVI                   | 2. Female | 77  | 0. Not diabetic               | 1. Ex smoker    |
| TAVI                   | 2. Female | 83  | 0. Not diabetic               | 0. Never smoked |
| TAVI                   | 1. Male   | 83  | 0. Not diabetic               | 1. Ex smoker    |
| TAVI                   | 1. Male   | 80  | 0. Not diabetic               | 1. Ex smoker    |
| TAVI                   | 1. Male   | 85  | 0. Not diabetic               | 0. Never smoked |
|                        |           |     |                               |                 |
|                        |           |     |                               |                 |

| <b>Creatinine (mmol/l)</b> | <b>Previous MI and interval be</b> | <b>History of pulmonary diseases</b>   |
|----------------------------|------------------------------------|----------------------------------------|
| 87                         | 0. No previous MI                  | 0. No pulmonary disease                |
| 93                         | 0. No previous MI                  | 0. No pulmonary disease                |
| 123                        | 0. No previous MI                  | 1. COAD/emphysema                      |
| 88                         | 5. MI >90 days                     | 0. No pulmonary disease                |
| 77                         | 0. No previous MI                  | 0. No pulmonary disease                |
| 131                        | 0. No previous MI                  | 0. No pulmonary disease                |
| 60                         | 0. No previous MI                  | 0. No pulmonary disease                |
| 133                        | 0. No previous MI                  | 1. COAD/emphysema                      |
| 116                        | 0. No previous MI                  | 1. COAD/emphysema                      |
| 86                         | 0. No previous MI                  | 0. No pulmonary disease                |
| 84                         | 0. No previous MI                  | 1. COAD/emphysema                      |
| 56                         | 5. MI >90 days                     | 2. Asthma                              |
| 157                        | 0. No previous MI                  | 1. COAD/emphysema                      |
| 119                        | 0. No previous MI                  | 3. Other significant pulmonary disease |
| 58                         | 0. No previous MI                  | 0. No pulmonary disease                |
| 92                         | 0. No previous MI                  | 0. No pulmonary disease                |
| 57                         | 0. No previous MI                  | 2. Asthma                              |
| 72                         | 5. MI >90 days                     | 0. No pulmonary disease                |
| 63                         | 0. No previous MI                  | 0. No pulmonary disease                |
| 89                         | 5. MI >90 days                     | 0. No pulmonary disease                |
| 90                         | 0. No previous MI                  | 1. COAD/emphysema                      |
| 118                        | 0. No previous MI                  | 0. No pulmonary disease                |
| 108                        | 5. MI >90 days                     | 0. No pulmonary disease                |
| 107                        | 0. No previous MI                  | 0. No pulmonary disease                |
| 100                        | 0. No previous MI                  | 0. No pulmonary disease                |
| 77                         | 0. No previous MI                  | 0. No pulmonary disease                |
| 64                         | 0. No previous MI                  | 0. No pulmonary disease                |
| 164                        | 5. MI >90 days                     | 0. No pulmonary disease                |
| 116                        | 0. No previous MI                  | 0. No pulmonary disease                |
| 84                         | 0. No previous MI                  | 0. No pulmonary disease                |
|                            |                                    |                                        |
|                            |                                    |                                        |

| <b>Pre-operative heart rhythm</b>                | <b>Previous cardiac surgery</b> |
|--------------------------------------------------|---------------------------------|
| 0. Sinus rhythm                                  | 0. No                           |
| 0. Sinus rhythm                                  | 0. No                           |
| 0. Sinus rhythm                                  | 0. No                           |
| 4. LBBB,6. Paced rhythm                          | 1. Previous CABG                |
| 1. Atrial fibrillation / flutter                 | 1. Previous CABG                |
| 1. Atrial fibrillation / flutter                 | 0. No                           |
| 6. Paced rhythm                                  | 0. No                           |
| 1. Atrial fibrillation / flutter,6. Paced rhythm | 0. No                           |
| 6. Paced rhythm                                  | 1. Previous CABG                |
| 1. Atrial fibrillation / flutter                 | 0. No                           |
| 1. Atrial fibrillation / flutter,6. Paced rhythm | 1. Previous CABG                |
| 0. Sinus rhythm                                  | 1. Previous CABG                |
| 0. Sinus rhythm                                  | 0. No                           |
| 6. Paced rhythm                                  | 0. No                           |
| 1. Atrial fibrillation / flutter                 | 0. No                           |
| 1. Atrial fibrillation / flutter                 | 0. No                           |
| 1. Atrial fibrillation / flutter                 | 0. No                           |
| 0. Sinus rhythm                                  | 0. No                           |
| 0. Sinus rhythm                                  | 0. No                           |
| 1. Atrial fibrillation / flutter                 | 0. No                           |
| 0. Sinus rhythm                                  | 1. Previous CABG                |
| 1. Atrial fibrillation / flutter                 | 0. No                           |
| 1. Atrial fibrillation / flutter                 | 1. Previous CABG                |
| 1. Atrial fibrillation / flutter                 | 0. No                           |
| 0. Sinus rhythm                                  | 0. No                           |
| 0. Sinus rhythm                                  | 0. No                           |
| 0. Sinus rhythm                                  | 0. No                           |
| 0. Sinus rhythm                                  | 1. Previous CABG                |
| 0. Sinus rhythm                                  | 0. No                           |
| 1. Atrial fibrillation / flutter                 | 0. No                           |
|                                                  |                                 |
|                                                  |                                 |

| <b>Previous PCI</b>                                                          | <b>BMI</b> |
|------------------------------------------------------------------------------|------------|
| 2. Yes - as part of a staged or hybrid procedure                             | 21.99      |
| 2. Yes - as part of a staged or hybrid procedure                             | 33.04      |
| 2. Yes - as part of a staged or hybrid procedure                             | 25.51      |
| 0. No                                                                        | 28.41      |
| 0. No                                                                        | 25.37      |
| 1. Yes - previous standalone PCI (NOT as part of staged or hybrid procedure) | 29.42      |
| 0. No                                                                        | 24.88      |
| 0. No                                                                        | 27.1       |
| 0. No                                                                        | 32         |
| 1. Yes - previous standalone PCI (NOT as part of staged or hybrid procedure) | 21.83      |
| 0. No                                                                        | 36.73      |
| 2. Yes - as part of a staged or hybrid procedure                             | 36.74      |
| 1. Yes - previous standalone PCI (NOT as part of staged or hybrid procedure) | 27.7       |
| 2. Yes - as part of a staged or hybrid procedure                             | 25.37      |
| 0. No                                                                        | 18.43      |
| 1. Yes - previous standalone PCI (NOT as part of staged or hybrid procedure) | 27.8       |
| 0. No                                                                        | 27.93      |
| 1. Yes - previous standalone PCI (NOT as part of staged or hybrid procedure) | 34.24      |
| 0. No                                                                        | 26.67      |
| 1. Yes - previous standalone PCI (NOT as part of staged or hybrid procedure) | 34.68      |
| 0. No                                                                        | 28.8       |
| 0. No                                                                        | 23.74      |
| 0. No                                                                        | 31.18      |
| 0. No                                                                        | 25.72      |
| 0. No                                                                        | 29.71      |
| 0. No                                                                        | 25.15      |
| 0. No                                                                        | 26.05      |
| 0. No                                                                        | 31.28      |
| 0. No                                                                        | 24.21      |
| 2. Yes - as part of a staged or hybrid procedure                             | 25.74      |
|                                                                              |            |
|                                                                              |            |

|                                             |
|---------------------------------------------|
| <b>LV function</b>                          |
| 1. Good (LVEF greater than or equal to 50%) |
| 2. Fair (LVEF 30 - 49%)                     |
| 1. Good (LVEF greater than or equal to 50%) |
| 3. Poor (LVEF less than 30%)                |
| 2. Fair (LVEF 30 - 49%)                     |
| 1. Good (LVEF greater than or equal to 50%) |
| 1. Good (LVEF greater than or equal to 50%) |
| 1. Good (LVEF greater than or equal to 50%) |
| 1. Good (LVEF greater than or equal to 50%) |
| 1. Good (LVEF greater than or equal to 50%) |
| 1. Good (LVEF greater than or equal to 50%) |
| 1. Good (LVEF greater than or equal to 50%) |
| 1. Good (LVEF greater than or equal to 50%) |
| 1. Good (LVEF greater than or equal to 50%) |
| 1. Good (LVEF greater than or equal to 50%) |
| 1. Good (LVEF greater than or equal to 50%) |
| 2. Fair (LVEF 30 - 49%)                     |
| 1. Good (LVEF greater than or equal to 50%) |
| 2. Fair (LVEF 30 - 49%)                     |
| 1. Good (LVEF greater than or equal to 50%) |
| 1. Good (LVEF greater than or equal to 50%) |
| 1. Good (LVEF greater than or equal to 50%) |
| 1. Good (LVEF greater than or equal to 50%) |
| 1. Good (LVEF greater than or equal to 50%) |
| 2. Fair (LVEF 30 - 49%)                     |
| 1. Good (LVEF greater than or equal to 50%) |
| 1. Good (LVEF greater than or equal to 50%) |
| 1. Good (LVEF greater than or equal to 50%) |
| 2. Fair (LVEF 30 - 49%)                     |
| 1. Good (LVEF greater than or equal to 50%) |
| 1. Good (LVEF greater than or equal to 50%) |
|                                             |
|                                             |
