# Supplementary material for: Cardiac rehabilitation to improve health-related quality of life following trans-catheter aortic valve implantation: a randomised controlled feasibility study: RECOVER–TAVI Pilot, ORCA 4, For the Optimal Restoration of Cardiac Activity Group
Source: PubMed Central journal article supplement (PMC6293531; doi:10.1186/s40814-018-0363-8), 2018-12-13
Supplement: 40814_2018_363_MOESM5_ESM.pdf [file 40814_2018_363_MOESM5_ESM.pdf]

| Study No | Gender | Age | Diabetes                      | Smoking status  | Creatinine (mmol/l) |
|----------|--------|-----|-------------------------------|-----------------|---------------------|
| 1        | female | 69  | 2. Diabetes (oral medicine)   | 1. Ex smoker    | 75                  |
| 2        | male   | 77  | 0. Not diabetic               | 0. Never smoked | 84                  |
| 3        | male   | 62  | 2. Diabetes (oral medicine)   | 0. Never smoked | 67                  |
| 4        | male   | 79  | 3. Diabetes (insulin)         | 0. Never smoked | 85                  |
| 5        | male   | 86  | 0. Not diabetic               | 0. Never smoked | 145                 |
| 6        | female | 74  | 0. Not diabetic               | 1. Ex smoker    | 95                  |
| 7        | female | 89  | 0. Not diabetic               | 0. Never smoked | 79                  |
| 8        | female | 86  | 0. Not diabetic               | 1. Ex smoker    | 63                  |
| 9        | female | 84  | 0. Not diabetic               | 0. Never smoked | 68                  |
| 10       | male   | 90  | 0. Not diabetic               | 1. Ex smoker    | 100                 |
| 11       | female | 83  | 0. Not diabetic               | 0. Never smoked | 77                  |
| 12       | female | 85  | 0. Not diabetic               | 0. Never smoked | 68                  |
| 13       | male   | 75  | 0. Not diabetic               | 1. Ex smoker    | 179                 |
| 14       | female | 87  | 0. Not diabetic               | 1. Ex smoker    | 91                  |
| 15       | male   | 67  | 1. Diabetes (dietary control) | 0. Never smoked | 69                  |
| 16       | male   | 80  | 0. Not diabetic               | 1. Ex smoker    | 84                  |
| 17       | female | 87  | 0. Not diabetic               | 0. Never smoked | 56                  |
| 18       | male   | 88  | 1. Diabetes (dietary control) | 0. Never smoked | 186                 |
| 19       | female | 80  | 0. Not diabetic               | 1. Ex smoker    | 72                  |
| 20       | male   | 73  | 0. Not diabetic               | 0. Never smoked | 125                 |
| 21       | male   | 86  | 0. Not diabetic               | 1. Ex smoker    | 90                  |
| 22       | female | 89  | 0. Not diabetic               | 1. Ex smoker    | 72                  |
| 23       | female | 82  | 1. Diabetes (dietary control) | 0. Never smoked | 58                  |
| 24       | female | 77  | 0. Not diabetic               | 0. Never smoked | 87                  |
| 25       | male   | 91  | 0. Not diabetic               | 1. Ex smoker    | 118                 |
| 26       | male   | 83  | 0. Not diabetic               | 1. Ex smoker    | 164                 |
| 27       | male   | 88  | 0. Not diabetic               | 1. Ex smoker    | 84                  |
| 28       | female | 83  | 0. Not diabetic               | 0. Never smoked | 64                  |
| 29       | female | 86  | 0. Not diabetic               | 0. Never smoked | 69                  |
| 30       | male   | 81  | 0. Not diabetic               | 1. Ex smoker    | 111                 |
| 31       | female | 83  | 0. Not diabetic               | 1. Ex smoker    | 56                  |
| 32       | female | 85  | 0. Not diabetic               | 0. Never smoked | 59                  |
| 33       | male   | 83  | 2. Diabetes (oral medicine)   | 1. Ex smoker    | 113                 |
| 35       | female | 91  | 0. Not diabetic               | 0. Never smoked | 56                  |
| 35       | female | 88  | 0. Not diabetic               | 0. Never smoked | 67                  |
| 36       | female | 65  | 0. Not diabetic               | 0. Never smoked | 95                  |
| 37       | female | 82  | 0. Not diabetic               | 0. Never smoked | 87                  |
| 38       | male   | 87  | 3. Diabetes (insulin)         | 1. Ex smoker    | 135                 |

**Previous MI and interval be**

- 5. MI >90 days
- 5. MI >90 days
- 0. No previous MI
- 5. MI >90 days
- 0. No previous MI
- 5. MI >90 days
- 0. No previous MI
- 0. No previous MI
- 0. No previous MI
- 5. MI >90 days
- 0. No previous MI
- 5. MI >90 days
- 0. No previous MI
- 5. MI >90 days
- 0. No previous MI

**History of pulmonary diseases**

- 1. COAD/emphysema
- 1. COAD/emphysema
- 0. No pulmonary disease
- 2. Asthma
- 0. No pulmonary disease
- 1. COAD/emphysema
- 0. No pulmonary disease
- 2. Asthma
- 0. No pulmonary disease
- 1. COAD/emphysema
- 0. No pulmonary disease
- 1. COAD/emphysema
- 0. No pulmonary disease
- 2. Asthma
- 0. No pulmonary disease
- 0. No pulmonary disease
- 1. COAD/emphysema
- 2. Asthma
- 0. No pulmonary disease
- 0. No pulmonary disease
- 1. COAD/emphysema
- 2. Asthma
- 0. No pulmonary disease
- 3. Other significant pulmonary disease
- 0. No pulmonary disease
- 1. COAD/emphysema
- 0. No pulmonary disease

**Pre-operative heart rhythm**

- 0. Sinus rhythm
- 0. Sinus rhythm
- 1. Atrial fibrillation / flutter
- 0. Sinus rhythm
- 6. Paced rhythm
- 0. Sinus rhythm
- 0. Sinus rhythm
- 1. Atrial fibrillation / flutter
- 1. Atrial fibrillation / flutter
- 0. Sinus rhythm
- 1. Atrial fibrillation / flutter
- 6. Paced rhythm
- 0. Sinus rhythm
- 0. Sinus rhythm
- 0. Sinus rhythm
- 1. Atrial fibrillation / flutter,6. Paced rhythm
- 0. Sinus rhythm
- 1. Atrial fibrillation / flutter
- 0. Sinus rhythm
- 0. Sinus rhythm
- 0. Sinus rhythm
- 1. Atrial fibrillation / flutter
- 0. Sinus rhythm,1. Atrial fibrillation / flutter
- 0. Sinus rhythm
- 0. Sinus rhythm
- 0. Sinus rhythm
- 0. Sinus rhythm
- 6. Paced rhythm
- 1. Atrial fibrillation / flutter
- 1. Atrial fibrillation / flutter
- 0. Sinus rhythm
- 1. Atrial fibrillation / flutter
- 2. First degree heart block,4. LBBB
- 0. Sinus rhythm
- 1. Atrial fibrillation / flutter
- 2. First degree heart block,4. LBBB
- 0. Sinus rhythm

**Previous cardiac surgery**

- 0. No
- 1. Previous CABG
- 0. No
- 0. No
- 2. Previous valve operation
- 0. No
- 2. Previous valve operation
- 0. No
- 1. Previous CABG
- 0. No
- 1. Previous CABG
- 1. Previous CABG
- 0. No
- 0. No
- 1. Previous CABG
- 1. Previous CABG
- 0. No
- 0. No
- 0. No
- 1. Previous CABG
- 1. Previous CABG
- 0. No
- 0. No
- 1. Previous CABG
- 0. No
- 1. Previous CABG
- 0. No
- 1. Previous CABG
- 0. No
- 0. No
- 0. No
- 0. No

**Previous PCI**

0. No

1. Yes - previous standalone PCI (NOT as part of staged or hybrid procedure)

0. No

1. Yes - previous standalone PCI (NOT as part of staged or hybrid procedure)

0. No

0. No

2. Yes - as part of a staged or hybrid procedure

0. No

0. No

2. Yes - as part of a staged or hybrid procedure

0. No

0. No

1. Yes - previous standalone PCI (NOT as part of staged or hybrid procedure)

0. No

0. No

0. No

2. Yes - as part of a staged or hybrid procedure

0. No

1. Yes - previous standalone PCI (NOT as part of staged or hybrid procedure)

0. No

2. Yes - as part of a staged or hybrid procedure

0. No

1. Yes - previous standalone PCI (NOT as part of staged or hybrid procedure)

0. No

| LV function                                 | Scales              |                   |
|---------------------------------------------|---------------------|-------------------|
|                                             | Physical Limitation | Symptom Stability |
| 1. Good (LVEF greater than or equal to 50%) | 100                 | 75                |
| 2. Fair (LVEF 30 - 49%)                     | 80                  | 75                |
| 1. Good (LVEF greater than or equal to 50%) | 58.33333333         | 50                |
| 2. Fair (LVEF 30 - 49%)                     | 85                  | 50                |
| 1. Good (LVEF greater than or equal to 50%) | 75                  | 50                |
| 1. Good (LVEF greater than or equal to 50%) | 70                  | 50                |
| 1. Good (LVEF greater than or equal to 50%) | 100                 | 50                |
| 1. Good (LVEF greater than or equal to 50%) | -                   | 50                |
| 1. Good (LVEF greater than or equal to 50%) | 41.66666667         | 25                |
| 1. Good (LVEF greater than or equal to 50%) | 65                  | 50                |
| 1. Good (LVEF greater than or equal to 50%) | 40                  | 50                |
| 1. Good (LVEF greater than or equal to 50%) | 41.66666667         | 50                |
| 1. Good (LVEF greater than or equal to 50%) | 58.33333333         | 0                 |
| 1. Good (LVEF greater than or equal to 50%) | 29.16666667         | 75                |
| 1. Good (LVEF greater than or equal to 50%) | 100                 | 50                |
| 1. Good (LVEF greater than or equal to 50%) | 75                  | 50                |
| 1. Good (LVEF greater than or equal to 50%) | 45                  | 50                |
| 1. Good (LVEF greater than or equal to 50%) | 95                  | 50                |
| 1. Good (LVEF greater than or equal to 50%) | 90                  | 50                |
| 1. Good (LVEF greater than or equal to 50%) | 100                 | 50                |
| 1. Good (LVEF greater than or equal to 50%) | 41.66666667         | 25                |
| 1. Good (LVEF greater than or equal to 50%) | 100                 | 50                |
| 1. Good (LVEF greater than or equal to 50%) | 100                 | 25                |
| 1. Good (LVEF greater than or equal to 50%) | 100                 | 50                |
| 1. Good (LVEF greater than or equal to 50%) | -                   | 50                |
| 2. Fair (LVEF 30 - 49%)                     | 37.5                | 50                |
| 1. Good (LVEF greater than or equal to 50%) | -                   | 50                |
| 1. Good (LVEF greater than or equal to 50%) | 91.66666667         | 100               |
| 2. Fair (LVEF 30 - 49%)                     | 41.66666667         | 75                |
| 1. Good (LVEF greater than or equal to 50%) | -                   | 50                |
| 1. Good (LVEF greater than or equal to 50%) | 100                 | 50                |
| 1. Good (LVEF greater than or equal to 50%) | 93.75               | 50                |
| 2. Fair (LVEF 30 - 49%)                     | 68.75               | 75                |
| 1. Good (LVEF greater than or equal to 50%) | 54.16666667         | 100               |
| 1. Good (LVEF greater than or equal to 50%) | 75                  | 50                |
| 3. Poor (LVEF less than 30%)                | 91.66666667         | 75                |
| 1. Good (LVEF greater than or equal to 50%) | 79.16666667         | 50                |
| 1. Good (LVEF greater than or equal to 50%) | 20.83333333         | 0                 |

| Symptom Frequency | Symptom Burden | Total Symptom Score | Self-Efficacy | Quality of Life |
|-------------------|----------------|---------------------|---------------|-----------------|
| 70.83333333       | 66.66666667    | 68.75               | 25            | 91.66666667     |
| 70.83333333       | 66.66666667    | 68.75               | 87.5          | 58.33333333     |
| 31.25             | 58.33333333    | 44.79166667         | 50            | 33.33333333     |
| 91.66666667       | 83.33333333    | 87.5                | 100           | 91.66666667     |
| 75                | 75             | 75                  | 37.5          | 75              |
| 85.41666667       | 83.33333333    | 84.375              | 87.5          | 91.66666667     |
| 75                | 75             | 75                  | 100           | 91.66666667     |
| 100               | 100            | 100                 | 100           | 100             |
| 4.166666667       | 0              | 2.083333333         | 87.5          | 16.66666667     |
| 72.91666667       | 100            | 86.45833333         | 62.5          | 100             |
| 37.5              | 66.66666667    | 52.08333333         | 100           | 33.33333333     |
| 54.16666667       | 50             | 52.08333333         | 100           | 58.33333333     |
| 58.33333333       | 41.66666667    | 50                  | 87.5          | 25              |
| 62.5              | 83.33333333    | 72.91666667         | 62.5          | 75              |
| 100               | 100            | 100                 | 87.5          | 100             |
| 50                | 33.33333333    | 41.66666667         | 100           | 33.33333333     |
| 54.16666667       | 58.33333333    | 56.25               | 75            | 16.66666667     |
| 100               | 100            | 100                 | 100           | 100             |
| 91.66666667       | 100            | 95.83333333         | 100           | 91.66666667     |
| 83.33333333       | 91.66666667    | 87.5                | 100           | 91.66666667     |
| 79.16666667       | 75             | 77.08333333         | 75            | 58.33333333     |
| 95.83333333       | 100            | 97.91666667         | 100           | 100             |
| 45.83333333       | 50             | 47.91666667         | 100           | 91.66666667     |
| 100               | 100            | 100                 | 100           | 100             |
| 70.83333333       | 83.33333333    | 77.08333333         | 100           | 100             |
| 91.66666667       | 75             | 83.33333333         | 100           | 75              |
| 100               | 100            | 100                 | 100           | 75              |
| 100               | 100            | 100                 | 87.5          | 91.66666667     |
| 70.83333333       | 66.66666667    | 68.75               | 87.5          | 50              |
| 66.66666667       | 75             | 70.83333333         | 100           | 75              |
| 83.33333333       | 83.33333333    | 83.33333333         | 100           | 75              |
| 79.16666667       | 100            | 89.58333333         | 62.5          | 83.33333333     |
| 58.33333333       | 83.33333333    | 70.83333333         | 37.5          | 66.66666667     |
| 72.91666667       | 66.66666667    | 69.79166667         | 37.5          | 66.66666667     |
| 100               | 100            | 100                 | 87.5          | 91.66666667     |
| 91.66666667       | 83.33333333    | 87.5                | 75            | 58.33333333     |
| 58.33333333       | 66.66666667    | 62.5                | 87.5          | 91.66666667     |
| 8.333333333       | 16.66666667    | 12.5                | 25            | 16.66666667     |

| Social Limitation | Overall Summary | Clinical Summary | Raw Responses |    |    |    |    |    |   |   |   |   |   |
|-------------------|-----------------|------------------|---------------|----|----|----|----|----|---|---|---|---|---|
|                   |                 |                  | 1A            | 1B | 1C | 1D | 1E | 1F | 2 | 3 | 4 | 5 |   |
|                   | 100             | 90.10416667      | 84.375        | 5  | 5  | 5  | 6  | 6  | 6 | 4 | 1 | 2 | 6 |
|                   | 58.33333333     | 66.35416667      | 74.375        | 5  | 5  | 4  | 2  | 5  | 6 | 4 | 5 | 6 | 3 |
|                   | 43.75           | 45.05208333      | 51.5625       | 1  | 2  | 4  | 4  | 4  | 5 | 3 | 2 | 4 | 3 |
|                   | 100             | 91.04166667      | 86.25         | 5  | 5  | 5  | 5  | 2  | 6 | 3 | 5 | 6 | 5 |
| -                 |                 | 75               | 75            | 4  | 4  | 4  | 4  | 6  | 6 | 3 | 5 | 6 | 1 |
|                   | 100             | 86.51041667      | 77.1875       | 5  | 5  | 4  | 4  | 6  | 1 | 3 | 4 | 4 | 7 |
| -                 |                 | 88.88888889      | 87.5          | 5  | 5  | 5  | 6  | 6  | 6 | 3 | 4 | 4 | 4 |
| -                 |                 | 100              | 100           | 5  | 5  | 6  | 6  | 6  | 6 | 3 | 5 | 6 | 7 |
|                   | 25              | 21.35416667      | 21.875        | 4  | 4  | 2  | 1  | 4  | 1 | 2 | 1 | 1 | 2 |
|                   | 37.5            | 72.23958333      | 75.72916667   | 5  | 5  | 3  | 1  | 4  | 6 | 3 | 2 | 5 | 5 |
|                   | 41.66666667     | 41.77083333      | 46.04166667   | 3  | 4  | 2  | 1  | 3  | 6 | 3 | 5 | 6 | 2 |
|                   | 58.33333333     | 52.60416667      | 46.875        | 4  | 3  | 3  | 2  | 3  | 1 | 3 | 5 | 6 | 1 |
|                   | 31.25           | 41.14583333      | 54.16666667   | 4  | 5  | 4  | 2  | 4  | 1 | 1 | 5 | 6 | 2 |
|                   | 58.33333333     | 58.85416667      | 51.04166667   | 3  | 3  | 3  | 2  | 1  | 1 | 4 | 3 | 4 | 4 |
|                   | 100             | 100              | 100           | 5  | 5  | 5  | 5  | 5  | 5 | 6 | 5 | 5 | 7 |
| -                 |                 | 50               | 58.33333333   | 6  | 5  | 5  | 6  | 2  | 6 | 3 | 3 | 3 | 3 |
|                   | 33.33333333     | 37.8125          | 50.625        | 5  | 5  | 1  | 2  | 1  | 6 | 3 | 1 | 3 | 4 |
|                   | 100             | 98.75            | 97.5          | 5  | 5  | 5  | 4  | 5  | 6 | 6 | 5 | 6 | 7 |
|                   | 75              | 88.125           | 92.91666667   | 5  | 5  | 4  | 4  | 5  | 6 | 3 | 5 | 6 | 6 |
|                   | 100             | 94.79166667      | 93.75         | 5  | 5  | 5  | 5  | 6  | 6 | 3 | 5 | 6 | 3 |
|                   | 62.5            | 59.89583333      | 59.375        | 3  | 3  | 2  | 3  | 2  | 3 | 2 | 5 | 6 | 5 |
| -                 |                 | 99.30555556      | 98.95833333   | 5  | 5  | 5  | 6  | 5  | 6 | 6 | 5 | 6 | 6 |
|                   | 100             | 84.89583333      | 73.95833333   | 5  | 5  | 5  | 5  | 6  | 6 | 2 | 3 | 3 | 2 |
|                   | 100             | 100              | 100           | 5  | 5  | 5  | 6  | 6  | 6 | 3 | 5 | 5 | 7 |
| -                 |                 | 88.54166667      | 77.08333333   | 2  | 6  | 1  | 6  | 6  | 6 | 3 | 1 | 3 | 6 |
|                   | 41.66666667     | 59.375           | 60.41666667   | 3  | 3  | 3  | 3  | 2  | 1 | 3 | 5 | 5 | 5 |
| -                 |                 | 87.5             | 100           | 4  | 6  | 5  | 6  | 6  | 6 | 3 | 5 | 6 | 7 |
|                   | 93.75           | 94.27083333      | 95.83333333   | 5  | 5  | 5  | 4  | 5  | 4 | 5 | 5 | 6 | 7 |
|                   | 75              | 58.85416667      | 55.20833333   | 4  | 3  | 3  | 2  | 2  | 2 | 4 | 5 | 6 | 4 |
| -                 |                 | 72.91666667      | 70.83333333   | 6  | 6  | 6  | 6  | 6  | 6 | 3 | 1 | 3 | 6 |
|                   | 100             | 89.58333333      | 91.66666667   | 5  | 5  | 5  | 6  | 5  | 6 | 3 | 5 | 5 | 3 |
|                   | 58.33333333     | 81.25            | 91.66666667   | 5  | 5  | 5  | 4  | 6  | 6 | 3 | 5 | 6 | 2 |
|                   | 25              | 57.8125          | 69.79166667   | 5  | 5  | 3  | 2  | 6  | 6 | 4 | 1 | 5 | 7 |
|                   | 66.66666667     | 64.32291667      | 61.97916667   | 5  | 4  | 3  | 3  | 3  | 1 | 5 | 4 | 4 | 4 |
|                   | 81.25           | 86.97916667      | 87.5          | 5  | 5  | 4  | 4  | 5  | 1 | 6 | 5 | 6 | 7 |
|                   | 75              | 78.125           | 89.58333333   | 5  | 5  | 5  | 4  | 5  | 4 | 4 | 5 | 6 | 6 |
|                   | 83.33333333     | 79.16666667      | 70.83333333   | 5  | 5  | 5  | 5  | 4  | 1 | 3 | 1 | 4 | 4 |
|                   | 16.66666667     | 16.66666667      | 16.66666667   | 3  | 3  | 1  | 2  | 1  | 1 | 1 | 1 | 1 | 2 |

| 6 | 7 | 8 | 9 | 10 | 11 | 12 | 13 | 14 | 15A | 15B | 15C | 15D |
|---|---|---|---|----|----|----|----|----|-----|-----|-----|-----|
| 4 | 7 | 6 | 5 | 2  |    | 5  | 4  | 5  | 5   | 6   | 6   | 5   |
| 3 | 4 | 3 | 5 | 4  | 5  | 2  | 4  | 4  | 3   | 3   | 4   | 6   |
| 4 | 2 | 2 | 3 | 2  | 4  | 2  | 2  | 3  | 2   | 2   | 5   | 2   |
| 3 | 7 | 6 | 5 | 5  | 5  | 5  | 4  | 5  | 6   | 6   | 5   | 5   |
| 2 | 7 | 6 | 5 | 3  | 2  | 5  | 5  | 2  | 6   | 6   | 6   | 6   |
| 5 | 5 | 4 | 5 | 4  | 5  | 4  | 5  | 5  | 5   | 5   | 5   | 6   |
| 4 | 7 | 4 | 4 | 5  | 5  | 4  | 5  | 5  | 6   | 6   | 3   | 6   |
| 6 | 7 | 6 | 5 | 5  |    | 5  | 5  | 5  | 6   | 6   | 5   | 6   |
| 1 | 1 | 1 | 1 | 4  | 5  | 1  | 1  | 3  | 1   | 4   | 2   | 1   |
| 5 | 7 | 5 | 5 | 4  | 3  | 5  | 5  | 5  | 3   | 6   | 2   | 6   |
| 4 | 3 | 2 | 1 | 5  |    | 2  | 3  | 2  | 1   | 2   | 5   | 6   |
| 2 | 2 | 2 | 5 | 5  | 5  | 3  | 2  | 5  | 3   | 2   | 5   | 6   |
| 1 | 2 | 2 | 5 | 5  | 4  | 3  | 1  | 2  | 2   | 2   | 3   | 2   |
| 4 | 4 | 5 | 5 | 4  | 3  | 5  | 3  | 4  | 3   | 3   | 4   | 6   |
| 6 | 7 | 5 | 5 | 5  | 4  | 5  | 5  | 5  | 5   | 5   | 5   | 5   |
| 2 | 2 | 2 | 5 | 5  |    | 2  | 2  | 3  | 3   | 6   | 6   | 6   |
| 3 | 5 | 4 | 5 | 5  | 3  | 2  | 1  | 2  | 2   | 2   | 3   | 6   |
| 6 | 7 | 6 | 5 | 5  |    | 5  | 5  | 5  | 5   | 5   | 5   |     |
| 5 | 6 | 5 | 5 | 5  | 5  | 4  | 5  | 5  | 3   | 4   | 5   | 6   |
| 4 | 7 | 6 | 5 | 5  |    | 5  | 4  | 5  | 5   | 5   | 5   | 5   |
| 4 | 4 | 3 | 5 | 4  |    | 3  | 3  | 4  | 2   | 4   | 3   | 5   |
| 5 | 7 | 6 | 5 | 5  | 5  | 5  | 5  | 5  | 6   | 5   | 6   | 6   |
| 2 | 2 | 4 | 5 | 5  | 5  | 5  | 5  | 4  | 5   | 5   | 5   | 6   |
| 6 | 7 | 5 | 5 | 5  | 5  | 5  | 5  | 5  | 6   | 6   | 5   | 5   |
| 5 | 7 | 6 | 5 | 5  |    | 5  | 5  | 5  | 6   | 4   | 6   | 6   |
| 2 | 7 | 6 | 5 | 5  | 5  | 2  | 5  | 5  | 3   | 4   | 1   | 6   |
| 5 | 7 | 6 | 5 | 5  |    | 5  | 4  | 3  | 6   | 6   | 5   | 6   |
| 5 | 7 | 5 | 5 | 4  | 5  | 5  | 4  | 5  | 5   | 4   | 5   | 5   |
| 3 | 3 | 3 | 5 | 4  | 5  | 3  | 3  | 3  | 6   | 4   | 4   | 6   |
| 4 | 6 | 5 | 5 | 5  |    | 5  | 4  | 3  | 6   | 6   | 6   | 6   |
| 3 | 7 | 5 | 5 | 5  |    | 5  | 2  | 5  | 5   | 6   | 6   | 5   |
| 5 | 7 | 5 | 5 | 5  | 2  | 5  | 5  | 3  | 3   | 4   | 3   | 6   |
| 5 | 3 | 3 | 5 | 4  | 1  | 3  | 3  | 5  | 2   | 2   | 6   | 6   |
| 3 | 5 | 4 | 5 | 1  | 4  | 4  | 4  | 3  | 3   | 3   | 5   | 6   |
| 5 | 7 | 5 | 5 | 5  | 4  | 5  | 4  | 5  | 2   | 5   | 5   | 5   |
| 4 | 6 | 4 | 5 | 4  | 4  | 4  | 3  | 3  | 3   | 4   | 5   | 4   |
| 3 | 6 | 4 | 5 | 5  | 4  | 5  | 4  | 5  | 4   | 4   | 5   | 6   |
| 2 | 2 | 2 | 1 | 2  | 2  | 2  | 1  | 2  | 2   | 2   | 1   | 6   |
